# Supplementary material for: Interleukin-1β Enhances Umbilical Cord Mesenchymal Stem Cell Adhesion Ability on Human Umbilical Vein Endothelial Cells via LFA-1/ICAM-1 Interaction
Source: Hindawi journal article supplement (doi:10.1155/2019/7267142), 2019-12-27

Supplementary figure 1

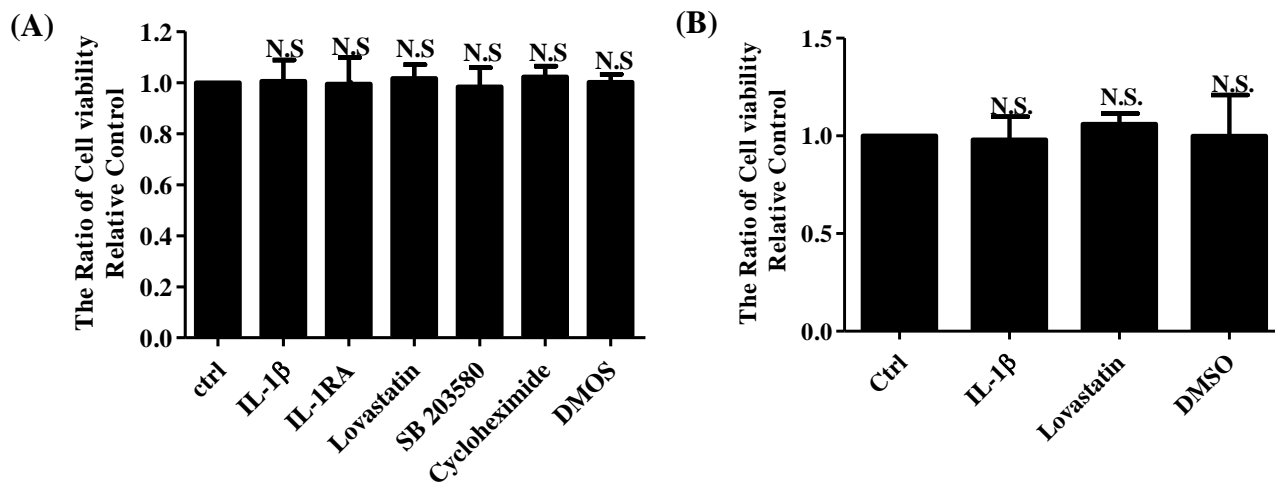

Supplementary figure 2

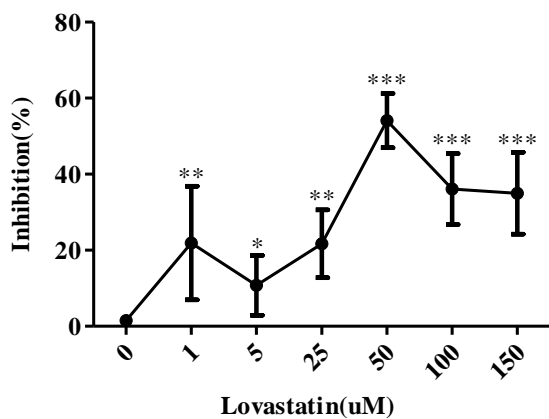

Supplementary figure 3

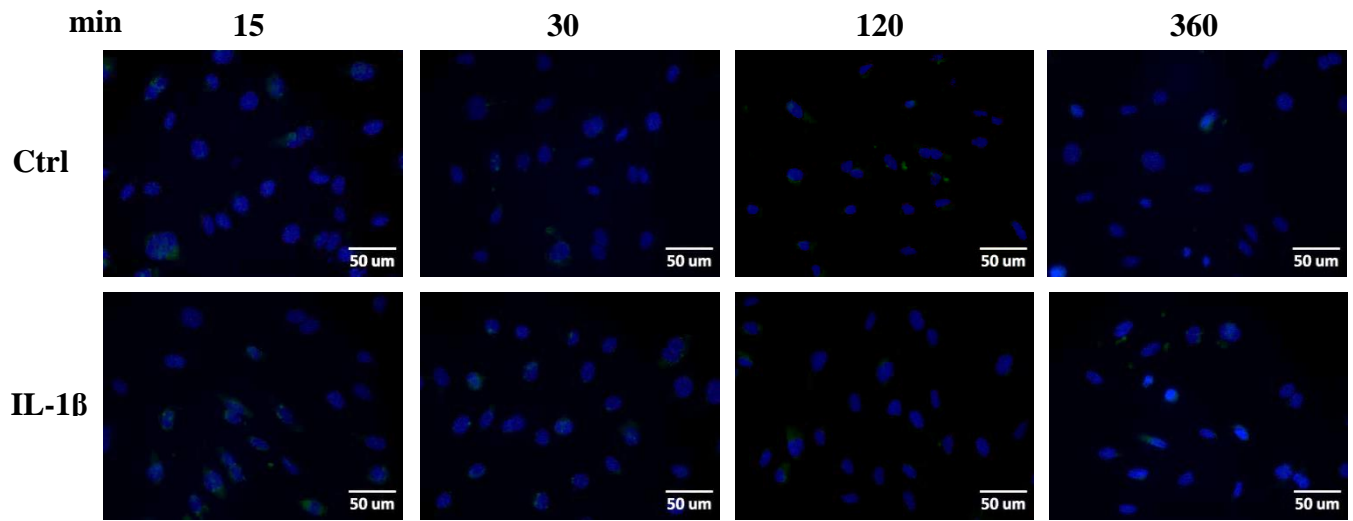

Supplementary figure 4

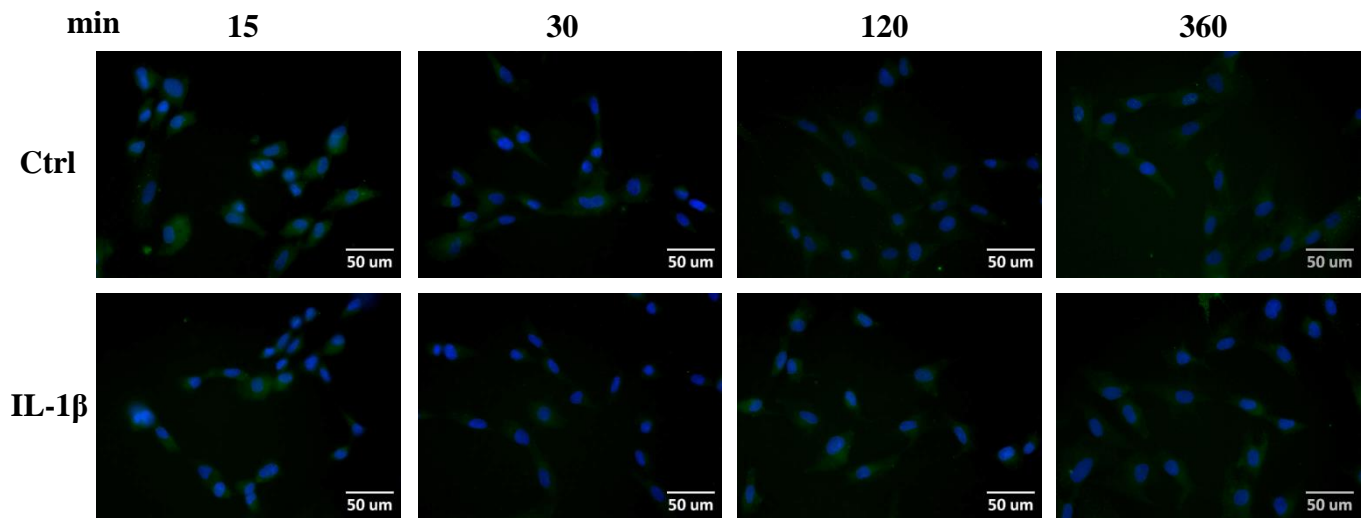

Supplement: f1 [file 7267142.f1.pdf]
